# Supplementary material for: Estrogen receptor 1 gene polymorphisms (PvuII and XbaI) are associated with type 2 diabetes in Palestinian women
Source: PeerJ. 2019 Jun 28;7:e7164. doi: 10.7717/peerj.7164 (PMC6601601; doi:10.7717/peerj.7164)
Supplement: Supplemental Information 2 — Raw data including demographic, clinical and biochemical data and genotyping results applied for analyses and preparation of tables 1-6. [file peerj-07-7164-s002.xlsx]

## Sheet: Cases
Pt NO.	Age	AgeDia	BMI	BP-sys	BP-dias	CVD	Retinopathy	Nephropathy	Amputations / Foot	FBS	HBA1C	LDL	HDL	TG	Chol.	rs9340799c(input)	rs9340799t (input)	NGS reads Ratio	rs9340799c	rs9340799t	genotype	rs2234693g (input)	rs2234693a (input)	NGS reads Ratio	rs2234693g	rs2234693a	Genotype
4	52	51	32.7	111	62	N	N	N	N	127	6.7	77	53	114	166	1040	1284	0.809969	c	t	TC	1139	1334	0.853823	g	a	AG
5	54	39	30.5	137	88	N	N	N	N	251	10.1	115	41	117	154	741	844	0.877962	c	t	TC	821	885	0.927684	g	a	AG
6	68	66	30.1	138	64	Y	N	Y	Y	175	7.8	66	58	83	142	820	832	0.985577	c	t	TC	876	881	0.994325	g	a	AG
7	48	36	40.5	158	99	N	N	N	N	322	11.1	120	28	188	203	2277	1	2277	c	c	CC	2433	2	1216.5	g	g	GG
9	58	47	32	130	80	N	N	N	N	103	6.8	128	27	198	236	12	3129	0.00383509	t	t	TT	5	3276	0.00152625	a	a	AA
11	48	50	31.6	108	69	N	N	N	N	150	6.6	111	28.6	175	221	1172	1272	0.921384	c	t	TC	1224	1346	0.909361	g	a	AG
15	62	46	41.9	185	85	N	N	N	N	245	8.4	148	28	1030	268	1117	1325	0.843019	c	t	TC	1172	1393	0.84135	g	a	AG
18	61	40	32.1	137	72	Y	N	Y	N	210	9.4	117	55	189	210	2	2966	0.000674309	t	t	TT	7	3123	0.00224143	a	a	AA
21	70	34	31.6	165	94	N	N	N	N	211	8.3	98	43.9	177	196.6	3435	2	1717.5	c	c	CC	3684	1	3684	g	g	GG
22	65	44	40.5	126	70	N	N	N	N	123	6.8	108	48	188	209	3	1237	0.00242522	t	t	TT	2	1301	0.00153728	a	a	AA
25	65	50	25.5	131	82	N	N	N	N	159	7	98	44	155	169	2	429	0.004662	t	t	TT	3	2235	0.00134228	a	a	AA
26	67	53	28.8	144	92	N	Y	N	N	210	8.9	88	48.3	153	188.6	1543	1699	0.908181	c	t	TC	1664	1770	0.940113	g	a	AG
28	69	49	29	141	63	N	N	N	N	91	5.3	107	43	122	161	35	33	1.06061	c	t	TC	44	39	1.12821	g	a	AG
30	64	54	34.9	150	82	N	N	N	N	170	8.8	142	33	178	201	3214	7	459.143	c	c	CC	8468	3	2822.67	g	g	GG
31	73	51	30.4	158	93	N	N	N	N	109	7.4	130	55	201	236	4	3620	0.00110497	t	t	TT	13	3853	0.00337399	a	a	AA
32	67	50	32.1	155	90	N	N	N	N	210	5.7	133	44	177	230	1173	1348	0.870178	c	t	TC	1358	1386	0.979798	g	a	AG
34	55	51	33.3	130	70	N	N	N	N	150	9	115	39.8	135	231	1754	2018	0.869177	c	t	TC	1912	2061	0.927705	g	a	AG
35	76	61	44.2	128	80	N	N	N	Y	108	8	110	41.9	127	133	2077	2306	0.900694	c	t	TC	2292	2362	0.970364	g	a	AG
36	47	51	25.9	114	76	N	N	N	N	137	6.6	89	48	147	118	5	3441	0.00145307	t	t	TT	1763	1834	0.961287	g	a	AG
37	54	51	26.8	120	72	N	Y	N	Y	121	6.2	112	55	188	231	1427	1632	0.874387	c	t	TC	1590	1698	0.936396	g	a	AG
40	56	51	35	124	80	N	N	N	N	198	6.3	134	28.6	187.3	240	3	2394	0.00125313	t	t	TT	1	2546	0.000392773	a	a	AA
41	62	43	27.8	130	70	N	N	N	N	160	7.5	169	52	259	273	1071	1215	0.881481	c	t	TC	1173	1262	0.929477	g	a	AG
43	38	52	43.4	150	100	N	N	N	N	147	6.8	115	54	147	178	1385	1544	0.897021	c	t	TC	4	3100	0.00129032	a	a	AA
47	45	48	33.1	127	80	N	N	N	N	125	7	79	40	144	189	5	2536	0.00197161	t	t	TT	5	2656	0.00188253	a	a	AA
48	42	51	26.1	144	74	Y	N	N	N	136	7.1	84	30.1	144.2	154	3561	6	593.5	c	c	CC	1866	1922	0.970864	g	a	AG
49	58	36	27.4	130	75	N	N	N	N	214	10.7	102	39	130	144	189	218	0.866972	c	t	TC	229	236	0.970339	g	a	AG
53	50	40	34	120	72	N	N	N	N	117	5.5	115	42	141	169	1240	1363	0.909758	c	t	TC	1369	1462	0.936389	g	a	AG
57	67	39	36.8	120	70	N	N	N	N	190	12.2	84	36.8	148	177	2	2297	0.000870701	t	t	TT	7	2420	0.00289256	a	a	AA
59	60	50	37.9	160	90	N	N	N	N	163	7.4	115	37	210	254	1167	1386	0.841991	c	t	TC	1347	1431	0.9413	g	a	AG
61	54	49	55.5	150	80	N	N	N	N	133	6.1	128	24	247	298	2555	3	851.667	c	c	CC	2778	1	2778	g	g	GG
62	39	59	42.5	130	80	N	N	N	N	202	7.9	124	38.6	243	183	993	1	993	c	c	CC	1089	5	217.8	g	g	GG
67	67	75	35.8	130	60	N	N	N	N	121	7.6	108	27	179	161	1503	1748	0.85984	c	t	TC	1615	1768	0.913462	g	a	AG
68	70	55	38.6	130	60	Y	N	Y	N	106	7.1	120.4	31	214	155	398	455	0.874725	c	t	TC	447	461	0.969631	g	a	AG
73	67	52	30.2	145	84	N	N	N	Y	210	8.9	98	45	145	162	1226	1462	0.838577	c	t	TC	1189	1396	0.851719	g	a	AG
74	54	38	32.8	160	80	Y	N	N	N	162	8.7	110	37	160	174	1430	1566	0.913155	c	t	TC	1429	1544	0.925518	g	a	AG
75	57	60	33.7	110	60	N	N	N	N	232	8.7	130	55	210	234	1333	1567	0.85067	c	t	TC	1408	1505	0.935548	g	a	AG
76	62	50	46.7	130	70	N	N	N	N	253	11.9	95	27	110	131	1142	1244	0.918006	c	t	TC	1129	1217	0.927691	g	a	AG
78	66	55	29.4	130	80	N	N	Y	N	200	8.5	110	40	150	164	2608	25	104.32	c	c	CC	2575	22	117.045	g	g	GG
83	66	45	36.7	135	73	N	Y	N	N	228	10.1	120	33	177	228	331	414	0.799517	c	t	TC	348	379	0.918206	g	a	AG
85	60	50	30.4	118	65	N	N	N	N	126	6.4	114	45	166	210	38	1005	0.0378109	t	t	TT	40	1012	0.0395257	a	a	AA
86	56	51	28.7	120	70	N	N	N	N	130	9.2	122	28	240	229	2311	11	210.091	c	c	CC	2307	12	192.25	g	g	GG
88	60	45	35.6	134	84	N	N	N	N	120	5.9	102	45	148	213	102	4025	0.0253416	t	t	TT	124	4009	0.0309304	a	a	AA
89	65	56	33.7	150	80	N	N	N	N	142	6.8	81.3	39.1	183	157	1469	1727	0.850608	c	t	TC	1421	1691	0.840331	g	a	AG
90	57	57	32.1	148	88	N	Y	N	Y	224	9.4	118	44	178	214	1134	1293	0.87703	c	t	TC	1125	1262	0.891442	g	a	AG
92	55	45	27.6	145	88	N	N	N	N	117	6.3	98	44	128	147	228	2203	0.103495	t	t	TT	205	2198	0.0932666	a	a	AA
93	52	58	35.2	120	80	N	N	N	N	156	7.6	110	48	144	191	1309	1466	0.892906	c	t	TC	1317	1448	0.90953	g	a	AG
95	72	64	30.4	180	100	Y	N	N	Y	110	7.8	75	37	138	151	542	644	0.841615	c	t	TC	556	625	0.8896	g	a	AG
96	58	50	30.5	150	85	N	N	N	N	314	12.7	112	33.2	176	123	1090	1274	0.855573	c	t	TC	35	2334	0.0149957	a	a	AA
98	76	45	42.7	104	72	N	N	N	N	169	6.7	95	40	224	232	54	2819	0.0191557	t	t	TT	58	2826	0.0205237	a	a	AA
99	70	49	39.9	152	84	N	N	N	N	111	8.5	83	39	239	204	1097	1252	0.876198	c	t	TC	1087	1201	0.905079	g	a	AG
100	84	56	31.6	130	70	Y	Y	Y	N	92	5.6	97	49	95	165	117	1269	0.0921986	t	t	TT	122	1167	0.104542	a	a	AA
101	55	52	28.9	144	84	N	N	N	N	144	6.1	78	44	147	155	49	1912	0.0256276	t	t	TT	48	1831	0.0262152	a	a	AA
102	45	59	25.9	120	80	N	N	N	N	124	5.9	77	33.5	147.8	155	51	1570	0.0324841	t	t	TT	53	1569	0.0337795	a	a	AA
105	65	54	33.4	148	90	N	N	N	N	147	7.2	115	36	178	188	1673	1339	1.24944	c	t	TC	1740	1780	0.977528	g	a	AG
106	55	55	32.4	138	79	N	N	N	N	212	7.9	128	33	178	217	14	2538	0.00551615	t	t	TT	17	2509	0.00677561	a	a	AA
108	55	45	33.5	137	84	N	N	N	N	244	12.2	77	33	128	198	1839	2079	0.88456	c	t	TC	1839	2079	0.88456	g	a	AG
114	60	40	33.3	126	74	N	N	N	N	203	10.3	78	38	147	160	13	2921	0.00445053	t	t	TT	16	2931	0.00545889	a	a	AA
115	55	55	30.5	144	86	N	N	N	N	100	7.4	88.9	48	119	191	1204	1527	0.788474	c	t	TC	1243	1437	0.864997	g	a	AG
116	56	50	30.4	124	86	N	N	N	N	116	6.5	74.5	55	158	149	1264	1394	0.906743	c	t	TC	1246	1375	0.906182	g	a	AG
117	48	48	31.2	128	84	N	N	N	N	184	12.7	88.6	47	177	236	1331	1595	0.834483	c	t	TC	1413	1564	0.903453	g	a	AG
118	58	41	42.6	120	62	N	N	N	N	180	8.1	76	44	158	163	1445	1750	0.825714	c	t	TC	1465	1736	0.843894	g	a	AG
120	65	43	28.9	148	88	Y	N	N	N	255	12.6	115	45	178	199	21	3699	0.00567721	t	t	TT	29	3665	0.00791269	a	a	AA
122	54	55	33.7	110	76	N	N	N	N	199	7.5	107.9	34	482	218	1493	1759	0.848778	c	t	TC	1532	1705	0.898534	g	a	AG
123	58	41	36.1	120	80	N	N	N	N	106	6.5	107	42	163	181	979	1351	0.724648	c	t	TC	1015	1264	0.803006	g	a	AG
124	55	55	32.9	110	70	N	N	N	N	215	10	182.7	23.7	193	245	1413	1674	0.844086	c	t	TC	1453	1611	0.901924	g	a	AG
125	64	55	34.5	140	70	N	N	N	N	165	8.9	90	60	140	130	3215	68	47.2794	c	c	CC	3076	56	54.9286	g	g	GG
126	57	54	30.5	120	80	N	N	N	N	144	8.6	110	55	177	210	1773	2132	0.831614	c	t	TC	1793	2069	0.866602	g	a	AG
127	53	57	33.6	144	90	N	N	N	N	215	6.5	88	45	155	178	1441	1756	0.820615	c	t	TC	1507	1672	0.901316	g	a	AG
128	70	54	27.9	120	80	N	N	N	N	124	6	77.6	36	114	180	549	619	0.886914	c	t	TC	582	685	0.849635	g	a	AG
133	66	49	35.6	132	79	N	Y	Y	N	144	8.3	110	45	180	215	2167	2480	0.87379	c	t	TC	2136	2395	0.891858	g	a	AG
134	55	26	33.6	124	82	N	N	Y	N	114	5.4	87	55	124	144	2421	3020	0.801656	c	t	TC	2409	2887	0.83443	g	a	AG
135	59	24	28	157	80	N	N	N	Y	229	11	177	33	366	281	738	48	15.375	c	c	CC	747	40	18.675	g	g	GG
137	36	55	28.4	120	80	N	N	N	N	128	5	78	42	119.5	144	848	1040	0.815385	c	t	TC	896	996	0.899598	g	a	AG
138	51	65	38.9	104	86	N	N	N	N	140	7	90	60	140	159	227	3639	0.0623798	t	t	TT	227	3682	0.0616513	a	a	AA
139	62	44	35.4	160	91	N	N	N	N	160	6.9	170	40	300	208	1798	2121	0.847713	c	t	TC	1896	2140	0.885981	g	a	AG
140	46	41	34.5	128	78	N	N	N	N	187	11.2	151	43	290	252	1317	1575	0.83619	c	t	TC	1427	1565	0.911821	g	a	AG
141	51	33	50.8	160	100	N	N	N	N	148	5.9	88	37	203	154	797	947	0.841605	c	t	TC	809	982	0.823829	g	a	AG
145	61	47	29.1	144	92	N	N	N	N	108	6.8	101	40	98	161	2465	2876	0.857093	c	t	TC	2535	2896	0.875345	g	a	AG
146	75	48	33.9	128	60	Y	N	N	N	130	7.8	110	45	180	201	158	6014	0.026272	t	t	TT	156	6112	0.0255236	a	a	AA
148	53	35	32.8	165	100	N	N	N	N	173	12.5	90	55	125	171	4305	308	13.9773	c	c	CC	4392	309	14.2136	g	g	GG
149	73	50	55.9	140	90	N	N	Y	N	197	9	100	50	150	192	15	309	0.0485437	t	t	TT	19	320	0.059375	a	a	AA
152	50	55	45	139	84	N	N	N	N	212	9.7	100	50	150	188	41	2905	0.0141136	t	t	TT	45	2906	0.0154852	a	a	AA
153	67	53	37.8	160	100	N	N	N	N	102	6.7	177	29	1289	280	2462	65	37.8769	c	c	CC	1294	1366	0.947291	g	a	AG
156	69	48	33.3	170	90	N	N	N	N	134	8.7	120	40	190	212	64	2917	0.0219403	t	t	TT	65	2976	0.0218414	a	a	AA
157	84	43	27	130	60	N	N	N	N	132	6.2	110	45	180	206	878	1046	0.839388	c	t	TC	936	1030	0.908738	g	a	AG
159	61	41	41.4	146	79	Y	N	N	N	115	6	95	58	120	162	194	3838	0.0505472	t	t	TT	220	3894	0.0564972	a	a	AA
160	57	64	27.3	130	60	N	N	N	N	143	5.1	90	55	125	175	1909	2286	0.835083	c	t	TC	1956	2324	0.841652	g	a	AG
161	76	59	31.2	140	80	N	N	N	N	172	6.8	90	60	110	127	1334	1576	0.846447	c	t	TC	1389	1596	0.870301	g	a	AG
162	44	57	28.5	128	80	N	N	N	N	110	4.9	84	52	142	155	1978	40	49.45	c	c	CC	2009	40	50.225	g	g	GG
163	69	60	33.2	130	70	N	N	N	N	149	7.8	95	55	125	165	1968	57	34.5263	c	c	CC	2037	62	32.8548	g	g	GG
164	56	45	46.4	130	70	N	N	N	N	136	7.7	180.4	17.5	249	248	2882	66	43.6667	c	c	CC	2940	74	39.7297	g	g	GG
165	65	58	36.6	150	80	Y	N	N	N	180	10.7	90	55	125	145	56	2733	0.0204903	t	t	TT	60	2800	0.0214286	a	a	AA
167	53	40	32.1	128	84	N	N	N	N	124	5.7	88	45	166	178	1131	1224	0.92402	c	t	TC	93	2349	0.0395913	a	a	AA
168	70	61	31.2	140	80	N	N	N	N	120	5.9	78	47	157	160	2322	105	22.1143	c	c	CC	2430	96	25.3125	g	g	GG
178	63	55	38.2	158	87	N	N	N	N	99	5.7	119	39	178	204	1439	1700	0.846471	c	t	TC	1522	1713	0.8885	g	a	AG
180	54	39	25.8	140	70	N	N	N	N	146	6.3	197	46	269	297	106	2364	0.0448393	t	t	TT	93	2410	0.0385892	a	a	AA
183	66	45	30.1	160	58	N	N	N	N	240.3	10.3	115	42	175	240	419	140	2.99286	c	c	CC	446	126	3.53968	g	g	GG
184	62	45	32	130	70	N	N	N	N	124	7.3	88	39	160	188	1279	1351	0.946706	c	t	TC	1361	1341	1.01491	g	a	AG
185	78	57	26.8	134	78	N	N	N	N	130	8.8	77.4	33	123	147	762	628	1.21338	c	t	TC	834	598	1.39465	g	a	AG
188	82	59	28.6	126	57	N	N	N	N	129	6.4	115	38	166	185	1554	158	9.83544	c	c	CC	1640	148	11.0811	g	g	GG
189	54	52	41.5	116	80	N	N	Y	Y	115	6.7	102	31	185	170	1112	1906	0.583421	c	t	TC	1351	1846	0.731853	g	a	AG
194	54	53	38.4	140	80	N	N	N	N	271	10.8	138	22.7	689	294	1089	1353	0.804878	c	t	TC	1088	1346	0.808321	g	a	AG

## Sheet: Control
Pt NO.	Age	BP-sys	BP-Dias	BMI	FBS	chol	rs9340799c(input)	rs9340799t (input)	NGS reads Ratio	rs9340799c	rs9340799t	genotype	rs2234693g (input)	rs2234693a (input)	NGS reads Ratio	rs2234693g	rs2234693a	Genotype
2	49	100	70	27	80	104	1058	2791	0.379076	t	t	TT	203	3821	0.0531275	a	a	AA
4	66	120	70	27	95	158	320000	340000	0.941176	c	t	TC	320000	340000	0.941176	g	a	AG
6	58	130	75	29	85	145	809	1379	0.586657	c	t	TC	854	1399	0.610436	g	a	AG
7	42	130	70	33	88	160	4862	221	22	c	c	CC	5258	231	22.7619	g	g	GG
8	46	116	70	32	70	144	4838	407	11.887	c	c	CC	5287	428	12.3528	g	g	GG
10	49	138	80	32	83	152	14	1118	0.0125224	t	t	TT	9	1221	0.00737101	a	a	AA
19	44	114	67	33.3	80	198.5	1125	2222	0.506301	c	t	TC	1239	2320	0.534052	g	a	AG
21	52	100	68	32.9	91	188	143	2467	0.0579651	t	t	TT	156	2569	0.060724	a	a	AA
23	45	120	80	25.5	100	136	34	5811	0.00585097	t	t	TT	52	6233	0.00834269	a	a	AA
24	53	105	36	25	85	155	84	5422	0.0154924	t	t	TT	109	5812	0.0187543	a	a	AA
26	55	123	70	32	90	227.6	2233	235	9.50213	c	c	CC	2374	269	8.82528	g	g	GG
27	48	130	85	27	90	187	1423	2197	0.647701	c	t	TC	1526	2317	0.65861	g	a	AG
30	49	91	63	27	72	154.3	2863	493	5.8073	c	c	CC	1548	2026	0.764067	g	a	AG
31	46	130	90	36.4	85	256	1677	2401	0.698459	c	t	TC	1805	2547	0.708677	g	a	AG
33	50	130	70	30.5	80	204	2402	1034	2.32302	c	c	CC	2612	1002	2.60679	g	g	GG
35	57	120	80	27.6	78	167	1383	2041	0.677609	c	t	TC	1512	2160	0.7	g	a	AG
36	56	116	86	34.4	80	224	495	77	6.42857	c	c	CC	520	92	5.65217	g	g	GG
38	53	118	72	28.6	84	187	35	1711	0.0204559	t	t	TT	42	1816	0.0231278	a	a	AA
40	56	120	72	45.4	95	328	432	533	0.810507	c	t	TC	456	584	0.780822	g	a	AG
42	66	130	76	25.1	77	188	726	1174	0.618399	c	t	TC	802	1215	0.660082	g	a	AG
43	55	122	78	34.8	95	207	1608	2281	0.704954	c	t	TC	1805	2313	0.780372	g	a	AG
44	54	120	68	37.8	89	244	1351	667	2.02549	c	c	CC	1411	676	2.08728	g	g	GG
46	45	138	84	33.2	90	217	3772	518	7.28185	c	c	CC	4066	541	7.51571	g	g	GG
47	42	110	87	33.2	97	198	1804	2575	0.700583	c	t	TC	140	4464	0.031362	a	a	AA
48	45	110	61	36.4	85	217	123	5971	0.0205996	t	t	TT	120	6398	0.0187559	a	a	AA
49	63	121	73	32.5	90	188	143	4193	0.0341045	t	t	TT	154	4472	0.0344365	a	a	AA
50	44	136	75	26	85	145	5725	364	15.728	c	c	CC	5679	331	17.1571	g	g	GG
51	47	128	86	45.5	100	299	1193	1390	0.858273	c	t	TC	1207	1348	0.895401	g	a	AG
53	43	115	67	26	90	144	3231	1766	1.82956	c	t	TC	1717	3016	0.569297	g	a	AG
56	52	140	80	29.7	79	184	40	5956	0.00671592	t	t	TT	42	5748	0.00730689	a	a	AA
57	40	133	82	30	86	214	1054	1360	0.775	c	t	TC	1089	1365	0.797802	g	a	AG
58	45	118	85	31.6	91	197.4	812	27	30.0741	c	c	CC	803	22	36.5	g	g	GG
59	53	116	93	30.9	85	188.7	304	9	33.7778	c	c	CC	325	5	65	g	g	GG
60	40	108	60	25.3	70	175.1	2079	3392	0.612913	c	t	TC	1303	4160	0.313221	a	a	AA
61	46	117	74	26.4	92	166	2792	4258	0.655707	c	t	TC	2887	4249	0.679454	g	a	AG
62	41	130	90	26	93	175	3385	2113	1.60199	c	t	TC	3564	2044	1.74364	g	a	AG
63	47	105	70	35	85	214	2308	3019	0.764492	c	t	TC	2377	2993	0.794186	g	a	AG
65	25	110	60	29	81	187	2809	3440	0.81657	c	t	TC	6197	259	23.9266	g	g	GG
66	40	129	80	31	74	194	2654	3462	0.766609	c	t	TC	2830	3489	0.811121	g	a	AG
68	41	105	58	24	87	155	1705	2267	0.752095	c	t	TC	1790	2249	0.795909	g	a	AG
69	44	109	74	33	90	213	148	37	4	c	c	CC	168	35	4.8	g	g	GG
70	45	103	77	30	93	198	71	1698	0.0418139	t	t	TT	60	1742	0.0344432	a	a	AA
71	53	123	78	39	93	248	5589	824	6.78277	c	c	CC	5817	768	7.57422	g	g	GG
72	40	100	60	35	87	219	193	8337	0.0231498	t	t	TT	198	8519	0.0232422	a	a	AA
73	50	115	69	40.5	92	247	215	5703	0.0376995	t	t	TT	226	5812	0.0388851	a	a	AA
74	55	111	70	29	91	198	701	1010	0.694059	c	t	TC	735	1029	0.714286	g	a	AG
75	45	137	77	37	97	223	2851	3651	0.780882	c	t	TC	3000	3685	0.814111	g	a	AG
76	43	112	66	28	97	188	189	5794	0.03262	t	t	TT	168	5866	0.0286396	a	a	AA
78	61	123	74	32	76	112	2260	2723	0.829967	c	t	TC	2429	2796	0.868741	g	a	AG
83	42	117	57	25	76	155	4030	248	16.25	c	c	CC	3987	234	17.0385	g	g	GG
84	43	113	78	27	86	147	2407	2862	0.84102	c	t	TC	2429	2790	0.870609	g	a	AG
85	53	133	88	28	98	188	3360	141	23.8298	c	c	CC	3381	123	27.4878	g	g	GG
88	46	129	79	44	100	310	76	5036	0.0150913	t	t	TT	76	5013	0.0151606	a	a	AA
89	42	120	80	25	87	155	1901	2230	0.852466	c	t	TC	1903	2175	0.874943	g	a	AG
111	55	120	80	35.2	94	188	17	7260	0.0023416	t	t	TT	21	7400	0.00283784	a	a	AA
120	44	140	80	25	99	155	4	3843	0.00104085	t	t	TT	7	3934	0.00177936	a	a	AA
123	48	116	93	33.5	78	178	142	9951	0.0142699	t	t	TT	155	10459	0.0148198	a	a	AA
139	54	110	77	28.6	74	188	7698	8925	0.862521	c	t	TC	8466	9143	0.925954	g	a	AG
143	58	114	76	34.1	94	199	68	13154	0.00516953	t	t	TT	83	13852	0.00599191	a	a	AA
144	55	130	80	30.8	99	163	95	1955	0.0485934	t	t	TT	53	13387	0.00395906	a	a	AA
C103	47	135	84	29.4	77	181	185000	200000	0.925	c	t	TC	45000	350000	0.128571	a	a	AA
C140	48	144	75	30.5	84	191	300000	300000	1	c	t	TC	300000	300000	1	g	a	AG
161	55	120	80	40.5	88	209	4635	9581	0.48377	t	t	TT	5025	9184	0.547147	g	a	AG
163	45	124	80	28.8	95	161	5329	6227	0.855789	c	t	TC	5669	6497	0.872557	g	a	AG
167	47	125	81	42	96	183	326	832	0.391827	t	t	TT	347	859	0.403958	a	a	AA
C1	43	125	85	40.5	89	144	1700	500000	0.0034	t	t	TT	1900	500000	0.0038	a	a	AA
C2	45	130	90	25.5	105	188	200000	200000	1	c	t	TC	200000	200000	1	g	a	AG
C3	76	120	70	28.8	119	205	4000	400000	0.01	t	t	TT	4000	400000	0.01	a	a	AA
C4	51	133	95	29	88	189	3500	500000	0.007	t	t	TT	3500	500000	0.007	a	a	AA
C5	61	123	77	34.9	100	210	2200	500000	0.0044	t	t	TT	2000	500000	0.004	a	a	AA
C6	44	130	87	30.4	97	155	8700	400000	0.02175	t	t	TT	8000	400000	0.02	a	a	AA
C7	41	108	68	32.1	112	144	400000	40000	10	c	c	CC	400000	40000	10	g	g	GG
C8	44	116	79	33.3	92	198	185000	200000	0.925	c	t	TC	183000	200000	0.915	g	a	AG
C9	49	122	85	44.2	87	208	10000	1000000	0.01	t	t	TT	10000	1000000	0.01	a	a	AA
C10	44	140	90	45	95	174	88000	30000	2.93333	c	c	CC	1700	100000	0.017	a	a	AA
C11	58	117	77	37.8	111	220	5000	750000	0.00666667	t	t	TT	50000	750000	0.0666667	a	a	AA
C12	40	130	83	33.3	85	137	830000	95000	8.73684	c	c	CC	800000	90000	8.88889	g	g	GG
C13	53	129	81	27	94	148	260000	320000	0.8125	c	t	TC	260000	300000	0.866667	g	a	AG
C14	43	119	73	41.4	78	158	3700	650000	0.00569231	t	t	TT	34000	650000	0.0523077	a	a	AA
C15	55	128	84	27.3	116	205	300000	500000	0.6	c	t	TC	300000	440000	0.681818	g	a	AG
C16	44	133	91	31.2	89	189	6500	700000	0.00928571	t	t	TT	7500	700000	0.0107143	a	a	AA
C17	43	139	87	28.5	75	169	180000	200000	0.9	c	t	TC	180000	200000	0.9	g	a	AG
C18	48	124	83	33.2	84	155	6000	500000	0.012	t	t	TT	5500	500000	0.011	a	a	AA
C19	47	115	73	46.4	83	148	9000	600000	0.015	t	t	TT	7700	650000	0.0118462	a	a	AA
C20	53	120	80	26.8	110	177	40000	96000	0.416667	t	t	TT	400000	90000	4.44444	g	g	GG
C21	52	120	82	28.6	107	147	5000	600000	0.00833333	t	t	TT	5000	600000	0.00833333	a	a	AA
C22	41	128	83	41.5	80	179	22000	300000	0.0733333	t	t	TT	200000	300000	0.666667	g	a	AG
C23	62	130	70	38.4	117	136	4000	500000	0.008	t	t	TT	4600	460000	0.01	a	a	AA
C24	46	134	84	40.5	83	199	450000	115000	3.91304	c	c	CC	500000	100000	5	g	g	GG
C25	47	124	84	32	79	158	10000	800000	0.0125	t	t	TT	12000	800000	0.015	a	a	AA
C26	40	122	87	31.6	84	155	74000	600000	0.123333	t	t	TT	65000	500000	0.13	a	a	AA
C27	45	127	86	41.9	73	148	6000	600000	0.01	t	t	TT	60000	600000	0.1	a	a	AA
C28	47	125	84	32.1	83	203	240000	350000	0.685714	c	t	TC	240000	340000	0.705882	g	a	AG
C29	54	114	65	31.6	109	155	20000	600000	0.0333333	t	t	TT	20000	600000	0.0333333	a	a	AA
C30	58	120	79	40.5	119	189	250000	350000	0.714286	c	t	TC	250000	340000	0.735294	g	a	AG
C31	43	127	83	29	86	194	600000	80000	7.5	c	c	CC	600000	80000	7.5	g	g	GG
C32	47	122	81	41.9	97	183	400000	400000	1	c	t	TC	400000	400000	1	g	a	AG
C33	42	130	87	32.1	95	141	544000	700000	0.777143	c	t	TC	540000	6500	83.0769	g	g	GG
C34	70	117	78	31.6	99	188	40000	400000	0.1	t	t	TT	40000	40000	1	g	a	AG
C35	44	122	83	40.5	87	155	365000	400000	0.9125	c	t	TC	365000	400000	0.9125	g	a	AG
C36	41	125	83	33	96	174	300000	300000	1	c	t	TC	300000	300000	1	g	a	AG
C37	51	132	86	31	101	180	33000	500000	0.066	t	t	TT	35000	500000	0.07	a	a	AA
C38	52	125	81	29	105	148	17000	500000	0.034	t	t	TT	17000	500000	0.034	a	a	AA
C39	48	120	82	33.5	86	156	500000	60000	8.33333	c	c	CC	500000	50000	10	g	g	GG
C40	70	133	89	29.5	97	130	600000	133000	4.51128	c	c	CC	600000	133400	4.49775	g	g	GG
C41	40	122	82	33	84	153	350000	365000	0.958904	c	t	TC	355000	363000	0.977961	g	a	AG
C42	42	128	83	44.2	99	173	280000	296000	0.945946	c	t	TC	279000	292000	0.955479	g	a	AG
C43	41	123	79	25.9	88	186	317000	331000	0.957704	c	t	TC	18000	600000	0.03	a	a	AA
C44	48	122	84	26.8	92	169	700000	560000	1.25	c	t	TC	700000	50000	14	g	g	GG
C45	47	120	74	35	86	177	320000	340000	0.941176	c	t	TC	330000	340000	0.970588	g	a	AG
C46	40	128	85	27.8	93	188	340000	360000	0.944444	c	t	TC	340000	350000	0.971429	g	a	AG
C47	49	120	86	29.5	85	144	300000	300000	1	c	t	TC	300000	300000	1	g	a	AG
